# Supplementary material for: Oral human papillomavirus (HPV) infection in men who have sex with men: prevalence and lack of anogenital concordance
Source: PubMed Central journal article supplement (PMC4453633; doi:10.1136/sextrans-2014-051955), 2015-04-17
Supplement: sextrans-2014-051955-s4.pdf [file sextrans-2014-051955-s4.pdf]

**Supplementary table 2. HPV type distribution at oral and anogenital sites in 21 MSM positive for any HPV in oral cavity.**

| Oral HPV type(s) | Anogenital HPV type(s) |
|------------------|------------------------|
| 6                | 11,68                  |
| 6                | -                      |
| 6,18             | -                      |
| 16               | -                      |
| 33               | 18                     |
| 45               | 6,11,68                |
| 51               | 18,68                  |
| 52               | HPV+                   |
| 56               | 16                     |
| 56               | 16,39                  |
| 56               | -                      |
| HPV+             | 6,11,18,56             |
| HPV+             | 16,68                  |
| HPV+             | 35,51,73               |
| HPV+             | 45,53                  |
| HPV+             | HPV+                   |
| HPV+             | HPV+                   |
| HPV+             | HPV+                   |
| HPV+             | -                      |
| HPV+             | -                      |
| HPV+             | -                      |

Key:

– anogenital samples with no detectable HPV DNA

HPV+ HPV DNA was detected but was not HPV types

6/11/16/18/31/33/35/39/45/51/52/56/58/59/68/26/53/66/70/73/82
