# Supplementary material for: Oral human papillomavirus (HPV) infection in men who have sex with men: prevalence and lack of anogenital concordance: Table 1
Source: HighWire-hosted journal article supplement (doi:10.1136/sextrans-2014-051955), 2015-04-17
Supplement: sextrans-2014-051955supp_table1.pdf [file sextrans-2014-051955supp_table1.pdf]

**Supplementary table 1. Selected participant characteristics of 151 HIV-negative MSM attending a sexual health clinic**

|                                                    | Total |      | Oral HPV not detected |      | Oral HPV detected |      |
|----------------------------------------------------|-------|------|-----------------------|------|-------------------|------|
|                                                    | n     | %    | n                     | %    | n                 | %    |
| <u>Age</u>                                         |       |      |                       |      |                   |      |
| 18-20                                              | 5     | 3.3  | 4                     | 3.1  | 1                 | 4.8  |
| 21-25                                              | 37    | 24.5 | 32                    | 24.6 | 5                 | 23.8 |
| 26-30                                              | 38    | 25.2 | 34                    | 26.2 | 4                 | 19.0 |
| 31-35                                              | 39    | 25.8 | 35                    | 26.9 | 4                 | 19.0 |
| 36-40                                              | 32    | 21.2 | 25                    | 19.2 | 7                 | 33.3 |
| <u>Ethnic group</u>                                |       |      |                       |      |                   |      |
| White                                              | 113   | 74.8 | 97                    | 74.6 | 16                | 76.2 |
| Black                                              | 20    | 13.2 | 17                    | 13.1 | 3                 | 14.3 |
| Asian & SE Asian                                   | 16    | 10.6 | 14                    | 10.8 | 2                 | 9.5  |
| Missing                                            | 2     | 1.3  | 2                     | 1.5  | 0                 | 0.0  |
| <u>Born in the UK</u>                              |       |      |                       |      |                   |      |
| No                                                 | 75    | 49.7 | 63                    | 48.5 | 12                | 57.1 |
| Yes                                                | 75    | 49.7 | 66                    | 50.8 | 9                 | 42.9 |
| Missing                                            | 1     | 0.7  | 1                     | 0.8  | 0                 | 0.0  |
| <u>Currently smoke</u>                             |       |      |                       |      |                   |      |
| No                                                 | 110   | 72.8 | 94                    | 72.3 | 16                | 76.2 |
| Yes                                                | 40    | 26.5 | 35                    | 26.9 | 5                 | 23.8 |
| Missing                                            | 1     | 0.7  | 1                     | 0.8  | 0                 | 0.0  |
| <u>At risk drinking (AUDIT-C)</u>                  |       |      |                       |      |                   |      |
| No                                                 | 43    | 28.5 | 37                    | 28.5 | 6                 | 28.6 |
| Yes                                                | 105   | 69.5 | 91                    | 70.0 | 14                | 66.7 |
| Missing                                            | 3     | 2.0  | 2                     | 1.5  | 1                 | 4.8  |
| <u>Currently employed</u>                          |       |      |                       |      |                   |      |
| No                                                 | 29    | 19.2 | 24                    | 18.5 | 5                 | 23.8 |
| Yes                                                | 121   | 80.1 | 105                   | 80.8 | 16                | 76.2 |
| Missing                                            | 1     | 0.7  | 1                     | 0.8  | 0                 | 0.0  |
| <u>Years of education after the age of 16</u>      |       |      |                       |      |                   |      |
| None                                               | 4     | 2.6  | 2                     | 1.5  | 2                 | 9.5  |
| Up to 2 years                                      | 18    | 11.9 | 13                    | 10.0 | 5                 | 23.8 |
| 3 years or more                                    | 109   | 72.2 | 97                    | 74.6 | 12                | 57.1 |
| Still in education                                 | 19    | 12.6 | 17                    | 13.1 | 2                 | 9.5  |
| Missing                                            | 1     | 0.7  | 1                     | 0.8  | 0                 | 0.0  |
| <u>Number of lifetime partners (oral and anal)</u> |       |      |                       |      |                   |      |
| <=30                                               | 57    | 37.7 | 47                    | 36.2 | 10                | 47.6 |
| >30                                                | 93    | 61.6 | 82                    | 63.1 | 11                | 52.4 |
| Missing                                            | 1     | 0.7  | 1                     | 0.8  | 0                 | 0.0  |
| <u>Age at first oral sex with man</u>              |       |      |                       |      |                   |      |
| Up to 15 years                                     | 34    | 22.5 | 30                    | 23.1 | 4                 | 19.0 |
| 16-20 years                                        | 82    | 54.3 | 70                    | 53.8 | 12                | 57.1 |
| 21-25 years                                        | 30    | 19.9 | 25                    | 19.2 | 5                 | 23.8 |
| 26-39 years                                        | 3     | 2.0  | 3                     | 2.3  | 0                 | 0.0  |
| Missing                                            | 2     | 1.3  | 2                     | 1.5  | 0                 | 0.0  |
| <u>Oral sex with a man in the last 3 months</u>    |       |      |                       |      |                   |      |
| No                                                 | 5     | 3.3  | 4                     | 3.1  | 1                 | 4.8  |
| Yes                                                | 145   | 96.0 | 125                   | 96.2 | 20                | 95.2 |
| Missing                                            | 1     | 0.7  | 1                     | 0.8  | 0                 | 0.0  |
| <u>Ever had oral sex with a woman</u>              |       |      |                       |      |                   |      |
| No                                                 | 72    | 47.7 | 63                    | 48.5 | 9                 | 42.9 |
| Yes                                                | 50    | 33.1 | 42                    | 32.3 | 8                 | 38.1 |
| Missing                                            | 29    | 19.2 | 25                    | 19.2 | 4                 | 19.0 |
| <u>Ever had a warts diagnosis</u>                  |       |      |                       |      |                   |      |
| No                                                 | 100   | 66.2 | 88                    | 67.7 | 12                | 57.1 |
| Yes                                                | 43    | 28.5 | 36                    | 27.7 | 7                 | 33.3 |
| Don't know                                         | 6     | 4.0  | 5                     | 3.8  | 1                 | 4.8  |
| Missing                                            | 2     | 6.67 | 1                     | 0.8  | 1                 | 4.8  |

Note: Formal risk factor analyses were not performed due to low numbers
